# Supplementary material for: Late Gestation Maternal Feed Restriction Decreases Microbial Diversity of the Placenta While Mineral Supplementation Improves Richness of the Fetal Gut Microbiome in Cattle
Source: MDPI journal article supplement (doi:10.3390/ani11082219), 2021-07-27
Supplement: s1 [file s1]

## Supplementary File

### Microbial DNA Library Preparation PCR Reaction 1:

Each reaction contained:

- 2.5  $\mu\text{L}$  of genomic DNA (5 ng/ $\mu\text{L}$ )
- 5  $\mu\text{L}$  forward and reverse amplicon primer (1  $\mu\text{M}$  each)
- 12.5  $\mu\text{L}$  of 2 X KAPA HiFi HotStart Ready Mix (Kapa Biosystems, Inc., Wilmington, MA, USA)

PCR Protocol:

- All steps performed in Mastercycler thermal cycler (Eppendorf, Hamburg, Germany)
- A first amplification: denaturation at 95°C for 3 min, followed by 25 cycles of denaturing (95°C for 30 s), annealing (60°C for 30 s) and extension (72°C for 30 s), with a final extension at 72°C for 5 min.
- Amplicons and controls were then cleaned with Agencourt AMPure XP beads (Beckman, Coulter Brea, CA, USA).

### Microbial DNA Library Preparation PCR Reaction 2:

Each reaction contained:

- 2  $\mu\text{L}$  Nextera XT forward and reverse index primers (Illumina, San Diego, CA, USA)
- 5  $\mu\text{L}$  amplicon DNA
- 25  $\mu\text{L}$  of 2 X KAPA HiFi HotStart Ready Mix
- 16  $\mu\text{L}$  PCR-grade water.

PCR Protocol

- All steps performed in Mastercycler thermal cycler (Eppendorf)
- Samples were denatured at 95°C for 3 min, followed by 8 cycles of a denaturing (95°C for 30 s), annealing (60°C for 30 s), and extension step (72°C for 30s ), with a final extension at 72°C for 5 min.
- Libraries were pooled at 30 ng/ $\mu\text{L}$  and then sequenced via the MiSeq platform (Illumina).
